# Supplementary material for: The Aging Slopes of Brain Structures Vary by Ethnicity and Sex: Evidence From a Large Magnetic Resonance Imaging Dataset From a Single Scanner of Cognitively Healthy Elderly People in Korea
Source: PubMed Central journal article supplement (PMC7437271; doi:10.3389/fnagi.2020.00233), 2020-08-12
Supplement: Data_Sheet_1.pdf [file Data_Sheet_1.pdf]

Supplementary Table 1. Percentage volume ratios of cortical and subcortical structure to ICV in the Korean elderly

|                            | age group (female) |       |        |        |        |        |        |        | age group (male) |       |        |        |        |        |        |        |
|----------------------------|--------------------|-------|--------|--------|--------|--------|--------|--------|------------------|-------|--------|--------|--------|--------|--------|--------|
|                            | 65-69              |       | 70-75  |        | 75-79  |        | 80-84  |        | 65-69            |       | 70-75  |        | 75-79  |        | 80-84  |        |
|                            | M                  | SD    | M      | SD     | M      | SD     | M      | SD     | M                | SD    | M      | SD     | M      | SD     | M      | SD     |
| <b>Brain volume</b>        | 75.224             | 3.148 | 73.402 | 3.138* | 72.267 | 3.213* | 71.706 | 3.809  | 71.883           | 2.854 | 70.704 | 3.030* | 68.550 | 2.856* | 66.498 | 2.819* |
| <b>Cortical volumes</b>    |                    |       |        |        |        |        |        |        |                  |       |        |        |        |        |        |        |
| frontal                    | 10.826             | 0.589 | 10.746 | 0.607  | 10.734 | 0.679  | 10.659 | 0.646  | 10.389           | 0.498 | 10.322 | 0.621  | 10.091 | 0.556* | 9.969  | 0.478  |
| temporal                   | 7.618              | 0.441 | 7.456  | 0.458* | 7.275  | 0.424* | 7.299  | 0.477  | 7.214            | 0.361 | 7.135  | 0.462  | 6.820  | 0.417* | 6.653  | 0.446* |
| parietal                   | 7.465              | 0.461 | 7.380  | 0.442  | 7.332  | 0.481  | 7.337  | 0.413  | 7.062            | 0.418 | 7.012  | 0.426  | 6.839  | 0.456* | 6.711  | 0.407  |
| occipital                  | 3.394              | 0.255 | 3.316  | 0.279* | 3.301  | 0.260  | 3.272  | 0.266  | 3.264            | 0.258 | 3.211  | 0.271  | 3.085  | 0.274* | 2.948  | 0.218* |
| cingulate                  | 1.516              | 0.120 | 1.509  | 0.118  | 1.495  | 0.132  | 1.468  | 0.119  | 1.466            | 0.105 | 1.454  | 0.120  | 1.442  | 0.117  | 1.376  | 0.117* |
| insular                    | 0.846              | 0.059 | 0.843  | 0.062  | 0.853  | 0.067  | 0.849  | 0.069  | 0.805            | 0.054 | 0.819  | 0.072  | 0.810  | 0.060  | 0.803  | 0.069  |
| <b>Subcortical volumes</b> |                    |       |        |        |        |        |        |        |                  |       |        |        |        |        |        |        |
| ventricle                  | 1.723              | 0.611 | 2.157  | 0.731* | 2.582  | 0.916* | 2.882  | 0.859* | 2.142            | 0.686 | 2.465  | 0.780* | 2.663  | 0.809  | 3.328  | 0.900* |
| thalamus                   | 1.035              | 0.099 | 1.005  | 0.094* | 1.009  | 0.096  | 1.030  | 0.117  | 0.965            | 0.100 | 0.941  | 0.097  | 0.925  | 0.093  | 0.911  | 0.084  |
| putamen                    | 0.686              | 0.070 | 0.659  | 0.080* | 0.644  | 0.088  | 0.625  | 0.093  | 0.630            | 0.081 | 0.624  | 0.074  | 0.605  | 0.081  | 0.566  | 0.083* |
| hippocampus                | 0.610              | 0.052 | 0.589  | 0.061* | 0.563  | 0.058* | 0.536  | 0.062* | 0.556            | 0.057 | 0.537  | 0.060* | 0.503  | 0.062* | 0.484  | 0.053  |
| caudate                    | 0.482              | 0.046 | 0.476  | 0.053  | 0.476  | 0.050  | 0.479  | 0.049  | 0.442            | 0.051 | 0.448  | 0.051  | 0.438  | 0.048  | 0.432  | 0.051  |
| amygdala                   | 0.233              | 0.023 | 0.226  | 0.025* | 0.220  | 0.025* | 0.213  | 0.025  | 0.222            | 0.024 | 0.217  | 0.024  | 0.203  | 0.026* | 0.195  | 0.024  |
| pallidus                   | 0.198              | 0.027 | 0.198  | 0.033  | 0.205  | 0.029* | 0.212  | 0.022  | 0.186            | 0.029 | 0.189  | 0.022  | 0.190  | 0.030  | 0.191  | 0.029  |
| accumbens                  | 0.064              | 0.012 | 0.059  | 0.010* | 0.056  | 0.010* | 0.051  | 0.009* | 0.058            | 0.009 | 0.057  | 0.010  | 0.054  | 0.011* | 0.049  | 0.010* |
| n                          | 233                |       | 239    |        | 132    |        | 34     |        | 83               |       | 128    |        | 106    |        | 53     |        |
| age (y)                    | 67.7               | 1.4   | 72.5   | 1.4    | 76.8   | 1.3    | 81.9   | 1.5    | 67.9             | 1.3   | 72.5   | 1.4    | 77.3   | 1.4    | 82.5   | 1.7    |
| MMSE                       | 27.6               | 1.8   | 27.1   | 2.1    | 26.6   | 2.4    | 25.1   | 2.9    | 28.4             | 1.2   | 28.0   | 1.6    | 27.6   | 1.6    | 27.0   | 1.6    |
| Education (y)              | 9.4                | 4.0   | 8.5    | 3.8    | 7.2    | 4.0    | 5.8    | 4.1    | 13.0             | 4.1   | 12.3   | 4.0    | 11.9   | 4.0    | 11.6   | 3.7    |

Volumes are presented in %.

\* indicates statistical significance of comparison with the immediately preceding age group ( $p < 0.05$ ) using pairwise t tests whose p values were adjusted by the Benjamini-Hochberg method.

MMSE, mini mental state examination; y, year.

Supplementary Table 2. Percentage volume ratios of cortical and subcortical structure to ICV in the Caucasian elderly

|                            | age group (female) |       |        |        |        |       |        |        | age group (male) |       |        |        |        |        |        |       |
|----------------------------|--------------------|-------|--------|--------|--------|-------|--------|--------|------------------|-------|--------|--------|--------|--------|--------|-------|
|                            | 65-69              |       | 70-75  |        | 75-79  |       | 80-84  |        | 65-69            |       | 70-75  |        | 75-79  |        | 80-84  |       |
|                            | M                  | SD    | M      | SD     | M      | SD    | M      | SD     | M                | SD    | M      | SD     | M      | SD     | M      | SD    |
| <b>Brain volume</b>        | 72.458             | 6.277 | 67.400 | 5.277* | 65.889 | 5.130 | 62.964 | 3.412* | 68.791           | 3.921 | 66.655 | 3.303* | 63.689 | 3.813* | 62.213 | 3.249 |
| <b>Cortical volumes</b>    |                    |       |        |        |        |       |        |        |                  |       |        |        |        |        |        |       |
| frontal                    | 10.282             | 0.948 | 9.643  | 0.878* | 9.568  | 0.987 | 9.109  | 0.858  | 9.763            | 0.982 | 9.358  | 0.768  | 9.024  | 0.757* | 8.952  | 0.762 |
| temporal                   | 7.104              | 0.681 | 6.403  | 0.706* | 6.376  | 0.678 | 5.908  | 0.475* | 6.778            | 0.651 | 6.358  | 0.512* | 6.095  | 0.512* | 5.984  | 0.540 |
| parietal                   | 6.756              | 0.523 | 6.153  | 0.666* | 6.103  | 0.757 | 5.799  | 0.515  | 6.307            | 0.661 | 5.982  | 0.488* | 5.662  | 0.549* | 5.741  | 0.574 |
| occipital                  | 3.206              | 0.294 | 2.860  | 0.360* | 2.785  | 0.374 | 2.622  | 0.356  | 3.025            | 0.342 | 2.769  | 0.300* | 2.662  | 0.288  | 2.656  | 0.292 |
| cingulate                  | 1.437              | 0.145 | 1.339  | 0.143* | 1.339  | 0.156 | 1.264  | 0.155  | 1.339            | 0.127 | 1.322  | 0.118  | 1.262  | 0.144  | 1.311  | 0.116 |
| insular                    | 0.814              | 0.102 | 0.763  | 0.067* | 0.769  | 0.079 | 0.727  | 0.063* | 0.795            | 0.092 | 0.736  | 0.068* | 0.730  | 0.064  | 0.750  | 0.076 |
| <b>Subcortical volumes</b> |                    |       |        |        |        |       |        |        |                  |       |        |        |        |        |        |       |
| ventricle                  | 2.036              | 1.122 | 2.428  | 1.175  | 2.726  | 0.974 | 3.136  | 1.231  | 2.116            | 0.669 | 2.592  | 0.980  | 3.462  | 1.541* | 3.575  | 1.205 |
| thalamus                   | 0.956              | 0.106 | 0.851  | 0.080* | 0.848  | 0.083 | 0.805  | 0.064* | 0.853            | 0.093 | 0.835  | 0.088  | 0.794  | 0.065* | 0.790  | 0.074 |
| putamen                    | 0.708              | 0.109 | 0.639  | 0.073* | 0.621  | 0.082 | 0.646  | 0.102  | 0.657            | 0.079 | 0.602  | 0.075* | 0.587  | 0.075  | 0.588  | 0.074 |
| hippocampus                | 0.565              | 0.061 | 0.499  | 0.086* | 0.480  | 0.070 | 0.422  | 0.069* | 0.519            | 0.062 | 0.486  | 0.063  | 0.427  | 0.059* | 0.433  | 0.061 |
| caudate                    | 0.506              | 0.076 | 0.474  | 0.064  | 0.481  | 0.063 | 0.492  | 0.086  | 0.451            | 0.049 | 0.452  | 0.056  | 0.449  | 0.061  | 0.448  | 0.071 |
| amygdala                   | 0.227              | 0.035 | 0.185  | 0.039* | 0.184  | 0.041 | 0.167  | 0.035  | 0.215            | 0.029 | 0.188  | 0.030* | 0.174  | 0.030* | 0.177  | 0.034 |
| pallidus                   | 0.191              | 0.025 | 0.191  | 0.026  | 0.184  | 0.020 | 0.186  | 0.025  | 0.176            | 0.018 | 0.182  | 0.020  | 0.179  | 0.020  | 0.174  | 0.019 |
| accumbens                  | 0.074              | 0.014 | 0.060  | 0.018* | 0.059  | 0.016 | 0.055  | 0.013  | 0.072            | 0.016 | 0.056  | 0.012* | 0.053  | 0.013  | 0.052  | 0.014 |
| n                          | 23                 |       | 65     |        | 51     |       | 24     |        | 16               |       | 75     |        | 49     |        | 39     |       |
| age (y)                    | 67.6               | 1.6   | 72.1   | 1.4    | 77.1   | 1.1   | 82.4   | 2.1    | 67.0             | 1.8   | 72.3   | 1.3    | 77.3   | 1.4    | 83.2   | 1.8   |
| MMSE                       | 29.2               | 1.3   | 29.3   | 0.7    | 29.2   | 1.1   | 28.8   | 1.3    | 29.1             | 0.6   | 29.0   | 1.2    | 29.0   | 1.2    | 29.1   | 1.1   |
| Education (y)              | 16.0               | 2.9   | 15.5   | 2.6    | 15.7   | 2.6   | 14.8   | 2.4    | 17.9             | 1.9   | 16.9   | 2.2    | 16.6   | 3.2    | 17.4   | 2.4   |

Volumes are presented in %.

\* indicates statistical significance of comparison with the immediately preceding age group ( $p < 0.05$ ) using pairwise t tests whose p values were adjusted by the Benjamini-Hochberg method.

MMSE, mini mental state examination; y, year.

Supplementary Table 3. Volumes of cortical and subcortical structures in the Korean elderly

|                            | age group (female) |       |        |        |        |        |        |        | age group (male) |       |         |        |         |        |         |        |
|----------------------------|--------------------|-------|--------|--------|--------|--------|--------|--------|------------------|-------|---------|--------|---------|--------|---------|--------|
|                            | 65-69              |       | 70-75  |        | 75-79  |        | 80-84  |        | 65-69            |       | 70-75   |        | 75-79   |        | 80-84   |        |
|                            | M                  | SD    | M      | SD     | M      | SD     | M      | SD     | M                | SD    | M       | SD     | M       | SD     | M       | SD     |
| <b>Brain volume</b>        | 1031.72            | 66.82 | 995.30 | 69.00* | 972.55 | 65.02* | 937.19 | 74.03* | 1129.81          | 81.23 | 1079.41 | 77.86* | 1054.87 | 75.61* | 1027.71 | 68.91* |
| <b>Cortical volumes</b>    |                    |       |        |        |        |        |        |        |                  |       |         |        |         |        |         |        |
| frontal                    | 148.45             | 10.45 | 145.65 | 10.60* | 144.40 | 10.78  | 139.17 | 9.89*  | 163.33           | 12.89 | 157.48  | 11.77* | 155.27  | 12.26  | 154.01  | 10.05  |
| temporal                   | 104.46             | 7.64  | 101.06 | 7.83*  | 97.90  | 7.33*  | 95.31  | 7.19   | 113.34           | 8.12  | 108.83  | 8.33*  | 104.88  | 8.11*  | 102.65  | 6.34   |
| parietal                   | 102.39             | 8.23  | 100.03 | 7.69*  | 98.61  | 7.41   | 95.83  | 6.97   | 110.99           | 9.25  | 107.02  | 8.70*  | 105.27  | 9.75   | 103.69  | 7.81   |
| occipital                  | 46.54              | 4.07  | 44.94  | 4.32*  | 44.38  | 3.64   | 42.72  | 3.77*  | 51.28            | 4.77  | 49.01   | 5.02*  | 47.42   | 4.50*  | 45.57   | 4.20*  |
| cingulate                  | 20.79              | 1.97  | 20.46  | 1.96   | 20.11  | 2.03   | 19.16  | 1.60*  | 23.05            | 2.21  | 22.20   | 2.24*  | 22.21   | 2.43   | 21.27   | 2.08*  |
| insular                    | 11.60              | 0.97  | 11.43  | 0.97   | 11.46  | 0.85   | 11.09  | 0.95   | 12.64            | 0.96  | 12.49   | 1.07   | 12.46   | 1.18   | 12.39   | 1.04   |
| <b>Subcortical volumes</b> |                    |       |        |        |        |        |        |        |                  |       |         |        |         |        |         |        |
| ventricle                  | 23.77              | 8.93  | 29.46  | 10.78* | 34.86  | 12.89* | 37.92  | 12.61  | 33.95            | 11.92 | 37.91   | 13.21* | 41.33   | 13.95  | 51.70   | 15.10* |
| thalamus                   | 14.18              | 1.31  | 13.61  | 1.29*  | 13.58  | 1.44   | 13.45  | 1.52   | 15.14            | 1.46  | 14.33   | 1.38*  | 14.22   | 1.45   | 14.05   | 1.19   |
| putamen                    | 9.41               | 1.07  | 8.92   | 1.11*  | 8.64   | 1.12*  | 8.17   | 1.28*  | 9.89             | 1.33  | 9.52    | 1.14*  | 9.30    | 1.23   | 8.75    | 1.33*  |
| hippocampus                | 8.36               | 0.69  | 7.97   | 0.76*  | 7.56   | 0.75*  | 6.98   | 0.75*  | 8.71             | 0.84  | 8.17    | 0.83*  | 7.71    | 0.86*  | 7.45    | 0.62   |
| caudate                    | 6.61               | 0.73  | 6.45   | 0.73*  | 6.40   | 0.67   | 6.25   | 0.66   | 6.94             | 0.81  | 6.83    | 0.80   | 6.74    | 0.78   | 6.69    | 0.93   |
| amygdala                   | 3.19               | 0.30  | 3.06   | 0.35*  | 2.96   | 0.35*  | 2.78   | 0.34*  | 3.48             | 0.37  | 3.31    | 0.36*  | 3.11    | 0.37*  | 3.00    | 0.33   |
| pallidus                   | 2.71               | 0.38  | 2.68   | 0.44   | 2.75   | 0.38   | 2.77   | 0.36   | 2.92             | 0.45  | 2.89    | 0.37   | 2.93    | 0.49   | 2.95    | 0.46   |
| accumbens                  | 0.88               | 0.16  | 0.80   | 0.14*  | 0.75   | 0.14*  | 0.67   | 0.12*  | 0.91             | 0.14  | 0.87    | 0.15*  | 0.83    | 0.17   | 0.75    | 0.16*  |
| n                          | 233                |       | 239    |        | 132    |        | 34     |        | 83               |       | 128     |        | 106     |        | 53      |        |
| age (y)                    | 67.7               | 1.4   | 72.5   | 1.4    | 76.8   | 1.3    | 81.9   | 1.5    | 67.9             | 1.3   | 72.5    | 1.4    | 77.3    | 1.4    | 82.5    | 1.7    |
| MMSE                       | 27.6               | 1.8   | 27.1   | 2.1    | 26.6   | 2.4    | 25.1   | 2.9    | 28.4             | 1.2   | 28.0    | 1.6    | 27.6    | 1.6    | 27.0    | 1.6    |
| Education (y)              | 9.4                | 4.0   | 8.5    | 3.8    | 7.2    | 4.0    | 5.8    | 4.1    | 13.0             | 4.1   | 12.3    | 4.0    | 11.9    | 4.0    | 11.6    | 3.7    |

Volumes are presented in cm<sup>3</sup>.

\* indicates statistical significance of comparison with the immediately preceding age group ( $p < 0.05$ ) using pairwise t tests whose p values were adjusted by the Benjamini-Hochberg method.

MMSE, mini mental state examination; y, year.

Supplementary Table 4. Volumes of cortical and subcortical structures in the Caucasian elderly

|                            | age group (female) |       |        |       |        |       |        |       | age group (male) |       |         |        |         |        |         |        |
|----------------------------|--------------------|-------|--------|-------|--------|-------|--------|-------|------------------|-------|---------|--------|---------|--------|---------|--------|
|                            | 65-69              |       | 70-75  |       | 75-79  |       | 80-84  |       | 65-69            |       | 70-75   |        | 75-79   |        | 80-84   |        |
|                            | M                  | SD    | M      | SD    | M      | SD    | M      | SD    | M                | SD    | M       | SD     | M       | SD     | M       | SD     |
| <b>Brain volume</b>        | 999.64             | 91.59 | 955.66 | 89.79 | 931.34 | 80.42 | 900.71 | 75.04 | 1084.68          | 80.58 | 1047.76 | 89.74  | 1043.13 | 72.16  | 1000.86 | 91.77* |
| <b>Cortical volumes</b>    |                    |       |        |       |        |       |        |       |                  |       |         |        |         |        |         |        |
| frontal                    | 141.71             | 12.30 | 136.48 | 11.54 | 135.06 | 13.11 | 130.14 | 13.30 | 153.72           | 15.53 | 147.02  | 15.22  | 147.70  | 12.02  | 143.79  | 14.39  |
| temporal                   | 97.88              | 8.82  | 90.57  | 9.04* | 90.05  | 9.30  | 84.47  | 8.31* | 106.70           | 9.85  | 99.90   | 10.04* | 99.69   | 7.28   | 96.14   | 10.32  |
| parietal                   | 93.20              | 8.15  | 87.13  | 9.39* | 86.08  | 9.47  | 82.94  | 8.85  | 99.29            | 10.26 | 93.98   | 9.51   | 92.63   | 8.50   | 92.20   | 10.58  |
| occipital                  | 44.28              | 4.91  | 40.44  | 4.55* | 39.19  | 3.94  | 37.45  | 5.08  | 47.73            | 6.43  | 43.45   | 5.00*  | 43.55   | 4.35   | 42.61   | 4.86   |
| cingulate                  | 19.87              | 2.49  | 18.95  | 1.93  | 18.89  | 1.93  | 18.01  | 1.84  | 21.10            | 2.17  | 20.76   | 2.25   | 20.62   | 2.09   | 21.09   | 2.48   |
| insular                    | 11.22              | 1.43  | 10.82  | 1.04  | 10.86  | 1.17  | 10.39  | 0.90  | 12.49            | 1.18  | 11.55   | 1.14*  | 11.97   | 1.21   | 12.05   | 1.35   |
| <b>Subcortical volumes</b> |                    |       |        |       |        |       |        |       |                  |       |         |        |         |        |         |        |
| ventricle                  | 28.57              | 16.89 | 35.12  | 19.13 | 39.01  | 15.09 | 45.62  | 21.21 | 33.97            | 12.58 | 41.14   | 17.72  | 57.80   | 28.44* | 57.87   | 21.52  |
| thalamus                   | 13.20              | 1.55  | 12.07  | 1.28* | 11.98  | 1.17  | 11.50  | 0.91  | 13.46            | 1.77  | 13.11   | 1.49   | 13.02   | 1.29   | 12.72   | 1.62   |
| putamen                    | 9.76               | 1.66  | 9.04   | 0.98* | 8.75   | 1.02  | 9.20   | 1.31  | 10.35            | 1.27  | 9.43    | 1.07*  | 9.61    | 1.18   | 9.43    | 1.12   |
| hippocampus                | 7.80               | 0.87  | 7.04   | 1.05* | 6.77   | 0.86  | 6.01   | 0.86* | 8.17             | 0.92  | 7.63    | 0.98*  | 6.98    | 0.89*  | 6.95    | 1.02   |
| caudate                    | 6.98               | 1.13  | 6.73   | 1.01  | 6.80   | 0.92  | 7.02   | 1.15  | 7.13             | 1.00  | 7.11    | 0.98   | 7.36    | 1.09   | 7.19    | 1.11   |
| amygdala                   | 3.13               | 0.45  | 2.61   | 0.52* | 2.59   | 0.51  | 2.38   | 0.48  | 3.38             | 0.45  | 2.95    | 0.46*  | 2.84    | 0.44   | 2.84    | 0.54   |
| pallidus                   | 2.64               | 0.40  | 2.71   | 0.33  | 2.61   | 0.32  | 2.65   | 0.34  | 2.78             | 0.33  | 2.86    | 0.32   | 2.92    | 0.30   | 2.80    | 0.34   |
| accumbens                  | 1.02               | 0.18  | 0.84   | 0.23* | 0.83   | 0.18  | 0.78   | 0.18  | 1.12             | 0.19  | 0.88    | 0.19*  | 0.86    | 0.18   | 0.82    | 0.20   |
| n                          | 23                 |       | 65     |       | 51     |       | 24     |       | 16               |       | 75      |        | 49      |        | 39      |        |
| age (y)                    | 67.6               | 1.6   | 72.1   | 1.4   | 77.1   | 1.1   | 82.4   | 2.1   | 67.0             | 1.8   | 72.3    | 1.3    | 77.3    | 1.4    | 83.2    | 1.8    |
| MMSE                       | 29.2               | 1.3   | 29.3   | 0.7   | 29.2   | 1.1   | 28.8   | 1.3   | 29.1             | 0.6   | 29.0    | 1.2    | 29.0    | 1.2    | 29.1    | 1.1    |
| Education (y)              | 16.0               | 2.9   | 15.5   | 2.6   | 15.7   | 2.6   | 14.8   | 2.4   | 17.9             | 1.9   | 16.9    | 2.2    | 16.6    | 3.2    | 17.4    | 2.4    |

Volumes are presented in cm<sup>3</sup>.

\* indicates statistical significance of comparison with the immediately preceding age group ( $p < 0.05$ ) using pairwise t tests whose p values were adjusted by the Benjamini-Hochberg method.

MMSE, mini mental state examination; y, year.

Supplementary Table 5. Differences of aging slopes between *APOE*  $\epsilon 4$  carriers and non-carriers

|                            | Female         |                  |                |                 | Male           |                  |                |                 |
|----------------------------|----------------|------------------|----------------|-----------------|----------------|------------------|----------------|-----------------|
|                            | Caucasian      |                  | Korean         |                 | Caucasian      |                  | Korean         |                 |
|                            | $\Delta$ slope | 95% CI           | $\Delta$ slope | 95% CI          | $\Delta$ slope | 95% CI           | $\Delta$ slope | 95% CI          |
| <b>Brain volume</b>        | <b>-0.610</b>  | [-1.732, -0.054] | -0.186         | [-0.416, 0.032] | -0.122         | [-0.413, 0.176]  | -0.206         | [-0.596, 0.216] |
| <b>Cortical volumes</b>    |                |                  |                |                 |                |                  |                |                 |
| frontal                    | -0.589         | [-1.588, 0.263]  | -0.158         | [-0.481, 0.126] | -0.508         | [-0.990, 0.005]  | -0.189         | [-0.631, 0.205] |
| temporal                   | -0.744         | [-1.520, 0.143]  | 0.069          | [-0.219, 0.373] | <b>-0.629</b>  | [-1.104, -0.145] | -0.161         | [-0.685, 0.246] |
| parietal                   | -0.749         | [-1.479, 0.045]  | -0.069         | [-0.414, 0.282] | -0.388         | [-0.934, 0.202]  | -0.269         | [-0.786, 0.245] |
| occipital                  | -0.966         | [-1.862, 0.060]  | -0.201         | [-0.602, 0.215] | -0.242         | [-0.885, 0.390]  | -0.367         | [-1.024, 0.323] |
| cingulate                  | -0.431         | [-1.527, 0.505]  | -0.114         | [-0.534, 0.274] | -0.395         | [-0.937, 0.154]  | -0.192         | [-1.113, 0.571] |
| insular                    | <b>-0.909</b>  | [-1.926, -0.018] | 0.270          | [-0.096, 0.623] | <b>-0.779</b>  | [-1.510, -0.050] | -0.292         | [-0.741, 0.211] |
| <b>Subcortical volumes</b> |                |                  |                |                 |                |                  |                |                 |
| ventricle                  | 1.411          | [-2.023, 4.695]  | 0.151          | [-2.139, 2.461] | 0.006          | [-1.987, 2.067]  | -0.733         | [-3.295, 1.634] |
| thalamus                   | -0.600         | [-2.001, 0.257]  | -0.246         | [-0.801, 0.335] | 0.145          | [-0.420, 0.749]  | -1.085         | [-2.099, 0.037] |
| putamen                    | <b>-1.415</b>  | [-2.449, -0.313] | 0.128          | [-0.545, 0.850] | -0.622         | [-1.359, 0.082]  | 0.980          | [-0.066, 2.149] |
| hippocampus                | -0.728         | [-2.055, 0.465]  | 0.331          | [-0.154, 0.786] | -0.499         | [-1.305, 0.320]  | -0.437         | [-1.394, 0.567] |
| caudate                    | <b>-1.177</b>  | [-2.471, -0.125] | -0.235         | [-0.755, 0.277] | -0.581         | [-1.362, 0.341]  | -0.294         | [-1.317, 0.749] |
| amygdala                   | -1.037         | [-2.979, 0.611]  | -0.136         | [-0.608, 0.432] | -0.780         | [-1.940, 0.305]  | 0.031          | [-0.949, 0.967] |
| pallidus                   | <b>-1.309</b>  | [-2.179, -0.460] | -0.038         | [-0.829, 0.709] | <b>-0.839</b>  | [-1.487, -0.192] | 0.072          | [-0.890, 1.006] |
| accumbens                  | <b>-1.825</b>  | [-3.555, -0.154] | 0.154          | [-0.760, 1.050] | -0.643         | [-2.100, 0.922]  | -0.045         | [-1.472, 1.977] |

$\Delta$ slope is the slope of *APOE*  $\epsilon 4$  carriers minus the slope of non-carriers. Values are presented in % per year, and based on 10,000 iterations of linear regression analysis.

$\Delta$ slope is presented in bold if the 95% confidence interval (CI) does not include the value of zero.
